# Supplementary material for: Discovery of Small Molecules from Echinacea angustifolia Targeting RNA-Dependent RNA Polymerase of Japanese Encephalitis Virus
Source: MDPI journal article supplement (doi:10.3390/life12070952), 2022-06-24
Supplement: s1 [file s1]

Pardeep Yadav<sup>1,5</sup>, Sherif A. El-Kafrawy<sup>2,3</sup>, Mai M. El-Day<sup>2,3</sup>, Wejdan T. Alghafari<sup>2,4</sup>, Arwa A. Faizo<sup>2,3</sup>,  
Saurabh Kumar Jha<sup>1</sup>, Vivek Dhar Dwivedi<sup>5,6\*</sup>, Esam I. Azhar<sup>2,3\*</sup>

<sup>1</sup>Department of Biotechnology, School of Engineering & Technology, Sharda University, Greater Noida, Uttar Pradesh, 201310, India

<sup>2</sup>Special Infectious Agents Unit-BSL-3, King Fahd Medical Research Center, King Abdulaziz University, Jeddah-21362, Saudi Arabia

<sup>3</sup>Department of Medical Laboratory Sciences, Faculty of Applied Medical Sciences, King Abdulaziz University, Jeddah-21362, Saudi Arabia

<sup>4</sup>Clinical Nutrition Department, Faculty of Applied Medical Sciences, King Abdulaziz University, Jeddah-21362, Saudi Arabia

<sup>5</sup>Center for Bioinformatics, Computational and Systems Biology, Pathfinder Research and Training Foundation, Greater Noida-201308, India

<sup>6</sup>Institute of Advanced Materials, IAAM, 59053 Ulrika, Sweden

**Corresponding Authors:**

**V.D.D.**, Email: vivek.dwivedi@iaam.se

**E.I.A.**, Email: eazhar@kau.edu.sa

## S1. Results

### S1.1. Structure-based virtual screening

**Table S1.** List of compounds from *Echinacea angustifolia* and binding affinities calculated against JEV<sup>RdRp</sup> domain using PyRx 0.8 virtual screening tool.

| S.no. | Pubchem CID | Compound names                                           | Binding affinity (Kcal/mol) |
|-------|-------------|----------------------------------------------------------|-----------------------------|
| 1     | 5281771     | Echinacoside                                             | -11.1                       |
| 2     | 6439941     | Echinacin                                                | -10.5                       |
| 3     | 5280805     | Rutin                                                    | -10.4                       |
| 4     | 5280637     | Cynaroside                                               | -10                         |
| 5     | 44259796    | Quercetagenin 7-glucoside                                | -10                         |
| 6     | 5282102     | Kaempferol-3-glucoside                                   | -9.4                        |
| 7     | 6537500     | Cynarin                                                  | -9.3                        |
| 8     | 5280794     | Stigmasterol                                             | -9.3                        |
| 9     | 5991        | Ethynylestradiol                                         | -9                          |
| 10    | 11101       | 2-nitrobenzaldehyde                                      | -9                          |
| 11    | 5315832     | Isochlorogenic acid                                      | -8.8                        |
| 12    | 5281769     | Cynarin                                                  | -8.8                        |
| 13    | 5134221     | Cichoric acid                                            | -8.8                        |
| 14    | 222284      | Beta-sitosterol                                          | -8.7                        |
| 15    | 5280445     | Luteolin                                                 | -8.6                        |
| 16    | 1794427     | Chlorogenic acid                                         | -8.6                        |
| 17    | 5280343     | Quercetin                                                | -8.5                        |
| 18    | 5281654     | Isorhamnetin                                             | -8.4                        |
| 19    | 5280863     | Kaempferol                                               | -8.4                        |
| 20    | 5280443     | Apigenin                                                 | -8.4                        |
| 21    | 6440397     | Caftaric acid                                            | -7.9                        |
| 22    | 440946      | Levan N                                                  | -7.8                        |
| 23    | 11587035    | Echinamine b                                             | -7.7                        |
| 24    | 131751109   | Neoherculin                                              | -7.1                        |
| 25    | 5281515     | Beta-caryophyllene                                       | -6.9                        |
| 26    | 14350       | Caryophyllene epoxide                                    | -6.9                        |
| 27    | 5988        | Sucrose                                                  | -6.8                        |
| 28    | 91723653    | Isogermacrene d                                          | -6.7                        |
| 29    | 5280934     | Linolenic acid                                           | -6.5                        |
| 30    | 6443006     | Dodeca-2e,4e-dienoic acid isobutylamide                  | -6.3                        |
| 31    | 593849      | N-(2-methylpropyl)undeca-2,4-dien-8,10-diynamide         | -6.3                        |
| 32    | 3931        | Octadeca-9,12-dienoic acid                               | -6.3                        |
| 33    | 441552      | 1-tridecene-3,5,7,9,11-pentayne                          | -6.1                        |
| 34    | 93009       | Bornyl acetate                                           | -6                          |
| 35    | 528755      | Tridec-1,3-diene-5,7,9,11-tetrayne                       | -6                          |
| 36    | 16219508    | Beta-d-arabino-hex-2-ulofuranosyl d-gluco-hexopyranoside | -6                          |
| 37    | 11413953    | Dodeca-2E,4E,8Z,10Z-Tetraenoic Acid Isobutylamide        | -6                          |
| 38    | 6441887     | Echinolone                                               | -5.8                        |
| 39    | 149801      | Isotussilagine                                           | -5.8                        |
| 40    | 64685       | Borneol                                                  | -5.6                        |
| 41    | 5322026     | (11E)-trideca-1,11-dien-3,5,7,9-tetrayne                 | -5.6                        |
| 42    | 22041880    | [(2E,4E)-dodeca-2,4-dienyl] 3-methylbutanoate            | -5.6                        |
| 43    | 12811248    | 8z-pentadecen-2-one                                      | -5.5                        |
| 44    | 11005       | Tetradecanoic acid                                       | -5.5                        |
| 45    | 10469       | Hexacosanoic acid                                        | -5.4                        |
| 46    | 68972       | triacontan-1-ol                                          | -5.3                        |
| 47    | 985         | Palmitic acid                                            | -5.2                        |
| 48    | 25913       | 1-pentadecene                                            | -5.2                        |
| 49    | 445639      | Oleic acid                                               | -5                          |
| 50    | 22199       | Ethyl docosanoate                                        | -5                          |
| 51    | 247         | Betaine                                                  | -4.5                        |
| 52    | 81653       | Dimethyl-isobutyl amine                                  | -3.5                        |
| 53    | 6354        | Oxirane                                                  | -2.3                        |

## S1.2. ADME profiling

**Table S2.** ADME profiling of the selected natural compounds against binding pocket of JEV<sup>RdRp</sup>.

| Properties                             | Echinacoside | Echinacin | Rutin    | Cynaroside | Quercetagenin 7-glucoside | Kaempferol-3-glucoside | Adenosine triphosphate | Guanosine-5'-triphosphate |
|----------------------------------------|--------------|-----------|----------|------------|---------------------------|------------------------|------------------------|---------------------------|
| LogS                                   | -1.243       | -4.214    | -3.928   | -3.812     | -3.498                    | -3.878                 | -0.543                 | -0.625                    |
| LogD                                   | 0.447        | 2.67      | 0.695    | 0.844      | -0.058                    | 1.124                  | -1.539                 | -2.101                    |
| LogP                                   | -1.514       | 3.481     | -0.763   | 0.317      | -0.456                    | -0.02                  | -3.918                 | -3.931                    |
| Pgp-inh                                | 0.001        | 0.002     | 0.002    | 0.001      | 0.007                     | 0.003                  | 0                      | 0                         |
| Pgp-sub                                | 0.962        | 0.835     | 0.978    | 0.895      | 0.7                       | 0.514                  | 0.556                  | 0.011                     |
| HIA                                    | 1            | 0.761     | 0.925    | 0.864      | 0.872                     | 0.627                  | 0.998                  | 0.782                     |
| F(20%)                                 | 0.975        | 0.882     | 0.234    | 0.842      | 0.484                     | 0.23                   | 0.999                  | 0.999                     |
| F(30%)                                 | 1            | 0.999     | 0.999    | 0.999      | 0.999                     | 0.995                  | 1                      | 1                         |
| Caco-2                                 | -6.559       | -6.106    | -6.336   | -6.126     | -6.359                    | -6.105                 | -6.497                 | -6.627                    |
| MDCk                                   | 0.000209     | 1.02E-05  | 2.97E-05 | 2.94E-05   | 1.01E-05                  | 1.44E-05               | 2.91E-05               | 0.000107                  |
| BBB                                    | 0.332        | 0.012     | 0.111    | 0.061      | 0.012                     | 0.074                  | 0.76                   | 0.693                     |
| PPB                                    | 86.35%       | 100.46%   | 83.81%   | 87.42%     | 87.84%                    | 87.82%                 | 14.13%                 | 39.03%                    |
| VDss                                   | 0.195        | 0.61      | 0.754    | 0.879      | 0.864                     | 0.946                  | 0.503                  | 0.412                     |
| Fu                                     | 29.06%       | 1.66%     | 20.87%   | 11.59%     | 16.08%                    | 14.66%                 | 74.65%                 | 70.39%                    |
| CYP1A2-inh                             | 0.001        | 0.16      | 0.013    | 0.087      | 0.038                     | 0.07                   | 0                      | 0                         |
| CYP1A2-sub                             | 0.007        | 0.032     | 0.026    | 0.048      | 0.026                     | 0.037                  | 0.214                  | 0.307                     |
| CYP2C19-inh                            | 0.012        | 0.245     | 0.011    | 0.017      | 0.007                     | 0.016                  | 0.049                  | 0.031                     |
| CYP2C19-sub                            | 0.049        | 0.053     | 0.05     | 0.054      | 0.045                     | 0.053                  | 0.025                  | 0.021                     |
| CYP2C9-inh                             | 0            | 0.597     | 0.002    | 0.012      | 0.007                     | 0.012                  | 0.002                  | 0.005                     |
| CYP2C9-sub                             | 0.355        | 0.938     | 0.246    | 0.205      | 0.084                     | 0.621                  | 0.591                  | 0.078                     |
| CYP2D6-inh                             | 0.001        | 0.649     | 0.007    | 0.049      | 0.006                     | 0.082                  | 0.022                  | 0                         |
| CYP2D6-sub                             | 0.151        | 0.535     | 0.155    | 0.209      | 0.139                     | 0.187                  | 0.04                   | 0.022                     |
| CYP3A4-inh                             | 0.009        | 0.44      | 0.013    | 0.059      | 0.018                     | 0.062                  | 0.003                  | 0.004                     |
| CYP3A4-sub                             | 0.003        | 0.091     | 0.003    | 0.019      | 0.005                     | 0.018                  | 0.001                  | 0.01                      |
| CL                                     | 0.301        | 4.242     | 1.349    | 4.318      | 3.231                     | 3.554                  | 1.346                  | 1.712                     |
| T12                                    | 0.605        | 0.541     | 0.524    | 0.631      | 0.901                     | 0.725                  | 0.9                    | 0.925                     |
| hERG                                   | 0.014        | 0.136     | 0.017    | 0.027      | 0.085                     | 0.024                  | 0.006                  | 0.003                     |
| H-HT                                   | 0.117        | 0.073     | 0.092    | 0.081      | 0.122                     | 0.113                  | 0.255                  | 0.901                     |
| DILI                                   | 0.065        | 0.844     | 0.982    | 0.95       | 0.986                     | 0.979                  | 0.935                  | 0.992                     |
| Ames                                   | 0.185        | 0.686     | 0.805    | 0.757      | 0.813                     | 0.775                  | 0.078                  | 0.989                     |
| ROA                                    | 0.082        | 0.033     | 0.05     | 0.034      | 0.024                     | 0.111                  | 0.042                  | 0.107                     |
| FDAMDD                                 | 0.003        | 0.122     | 0.014    | 0.031      | 0.008                     | 0.011                  | 0.937                  | 0.654                     |
| SkinSen                                | 0.146        | 0.856     | 0.036    | 0.346      | 0.51                      | 0.057                  | 0.328                  | 0.964                     |
| Carcinogenicity                        | 0.056        | 0.685     | 0.064    | 0.569      | 0.053                     | 0.095                  | 0.466                  | 0.679                     |
| EC                                     | 0.003        | 0.003     | 0.003    | 0.003      | 0.003                     | 0.003                  | 0.003                  | 0.003                     |
| EI                                     | 0.004        | 0.022     | 0.01     | 0.031      | 0.081                     | 0.015                  | 0.012                  | 0.045                     |
| Respiratory                            | 0.006        | 0.027     | 0.015    | 0.061      | 0.017                     | 0.024                  | 0.837                  | 0.906                     |
| BCF                                    | 0.868        | 0.916     | 0.938    | 0.819      | 0.929                     | 0.771                  | 0.269                  | -0.117                    |
| IGC50                                  | 4.198        | 5.115     | 3.968    | 4.149      | 3.861                     | 3.905                  | 2.789                  | 3.985                     |
| LCS0                                   | 5.001        | 5.818     | 4.92     | 4.845      | 4.441                     | 4.732                  | 4.129                  | 4.586                     |
| LC50DM                                 | 5.535        | 6.081     | 5.517    | 5.437      | 5.436                     | 5.136                  | 4.156                  | 5.14                      |
| NR-AR                                  | 0.003        | 0.016     | 0.264    | 0.012      | 0.022                     | 0.16                   | 0.006                  | 0.003                     |
| NR-AR-LBD                              | 0.611        | 0.866     | 0.636    | 0.277      | 0.329                     | 0.536                  | 0.001                  | 0.002                     |
| NR-AhR                                 | 0.156        | 0.916     | 0.835    | 0.882      | 0.884                     | 0.906                  | 0                      | 0                         |
| NR-Aromatase                           | 0.879        | 0.923     | 0.914    | 0.914      | 0.901                     | 0.938                  | 0                      | 0                         |
| NR-ER                                  | 0.216        | 0.878     | 0.209    | 0.273      | 0.262                     | 0.374                  | 0.027                  | 0.029                     |
| NR-ER-LBD                              | 0.098        | 0.938     | 0.127    | 0.17       | 0.206                     | 0.566                  | 0.007                  | 0.004                     |
| NR-PPAR-gamma                          | 0.954        | 0.979     | 0.953    | 0.932      | 0.942                     | 0.905                  | 0.002                  | 0.002                     |
| SR-ARE                                 | 0.211        | 0.937     | 0.125    | 0.476      | 0.485                     | 0.32                   | 0.001                  | 0.001                     |
| SR-ATAD5                               | 0.89         | 0.737     | 0.586    | 0.428      | 0.374                     | 0.234                  | 0.014                  | 0.004                     |
| SR-HSE                                 | 0.862        | 0.896     | 0.405    | 0.639      | 0.405                     | 0.191                  | 0.001                  | 0                         |
| SR-MMP                                 | 0.862        | 0.971     | 0.763    | 0.745      | 0.825                     | 0.767                  | 0.003                  | 0.005                     |
| SR-p53                                 | 0.688        | 0.969     | 0.74     | 0.835      | 0.861                     | 0.853                  | 0.007                  | 0.004                     |
| MW                                     | 786.26       | 578.14    | 610.15   | 448.1      | 480.09                    | 448.1                  | 507                    | 519.97                    |
| Vol                                    | 725.847      | 555.862   | 552.318  | 413.147    | 430.728                   | 413.147                | 374.04                 | 384.795                   |
| Dense                                  | 1.083        | 1.04      | 1.105    | 1.085      | 1.115                     | 1.085                  | 1.355                  | 1.351                     |
| nHA                                    | 20           | 12        | 16       | 11         | 13                        | 11                     | 18                     | 19                        |
| nHD                                    | 12           | 6         | 10       | 7          | 9                         | 7                      | 5                      | 4                         |
| TPSA                                   | 324.44       | 196.35    | 269.43   | 190.28     | 230.74                    | 190.28                 | 270.38                 | 290.02                    |
| nRot                                   | 14           | 8         | 6        | 4          | 4                         | 4                      | 8                      | 12                        |
| nRing                                  | 5            | 5         | 5        | 4          | 4                         | 4                      | 3                      | 2                         |
| MaxRing                                | 6            | 10        | 10       | 10         | 10                        | 10                     | 9                      | 9                         |
| nHet                                   | 20           | 12        | 16       | 11         | 13                        | 11                     | 21                     | 22                        |
| fChar                                  | 0            | 0         | 0        | 0          | 0                         | 0                      | 0                      | -1                        |
| nRig                                   | 32           | 32        | 30       | 24         | 24                        | 24                     | 22                     | 19                        |
| Flex                                   | 0.438        | 0.25      | 0.2      | 0.167      | 0.167                     | 0.167                  | 0.364                  | 0.632                     |
| nStereo                                | 15           | 5         | 10       | 5          | 5                         | 5                      | 4                      | 3                         |
| Toxicophores                           | 4            | 2         | 2        | 2          | 2                         | 1                      | 1                      | 2                         |
| Acute_Aquatic_Toxicity                 | 5            | 5         | 2        | 2          | 2                         | 2                      | 0                      | 0                         |
| LD50_oral                              | 0            | 0         | 0        | 0          | 0                         | 0                      | 0                      | 1                         |
| NonGenotoxic_Carcinogenicity           | 1            | 1         | 0        | 0          | 0                         | 0                      | 0                      | 0                         |
| Skin_Sensitization                     | 9            | 5         | 8        | 7          | 10                        | 4                      | 0                      | 2                         |
| SureChEMBL                             | 0            | 0         | 0        | 0          | 0                         | 0                      | 1                      | 2                         |
| Genotoxic_Carcinogenicity_Mutagenicity | 1            | 1         | 0        | 0          | 0                         | 0                      | 0                      | 0                         |
| NonBiodegradable                       | 2            | 1         | 2        | 2          | 2                         | 2                      | 1                      | 1                         |
| QED                                    | 0.054        | 0.138     | 0.14     | 0.261      | 0.208                     | 0.279                  | 0.26                   | 0.172                     |
| Synth                                  | 5.372        | 4.081     | 4.783    | 3.924      | 4.143                     | 3.884                  | 6.145                  | 6.162                     |
| Fsp3                                   | 0.571        | 0.2       | 0.444    | 0.286      | 0.286                     | 0.286                  | 0.5                    | 0.3                       |
| MCE-18                                 | 131.182      | 101.611   | 122.949  | 87.63      | 94.37                     | 87.63                  | 91.867                 | 44                        |
| Natural Product-likeness               | 1.605        | 1.535     | 2.015    | 1.972      | 2.164                     | 2.073                  | 0.651                  | 0.079                     |
| Alarm_NMR                              | 3            | 3         | 3        | 3          | 3                         | 2                      | 0                      | 1                         |
| BMS                                    | 1            | 0         | 0        | 0          | 1                         | 0                      | 0                      | 2                         |
| Chelating                              | 1            | 0         | 1        | 1          | 3                         | 0                      | 0                      | 0                         |
| PAINS                                  | 1            | 0         | 1        | 1          | 1                         | 0                      | 0                      | 0                         |
| Lipinski                               | Rejected     | Rejected  | Rejected | Rejected   | Rejected                  | Rejected               | Rejected               | Rejected                  |
| Pfizer                                 | Accepted     | Accepted  | Accepted | Accepted   | Accepted                  | Accepted               | Accepted               | Accepted                  |
| GSK                                    | Rejected     | Rejected  | Rejected | Rejected   | Rejected                  | Rejected               | Rejected               | Rejected                  |
| GoldenTriangle                         | Rejected     | Rejected  | Rejected | Accepted   | Accepted                  | Accepted               | Rejected               | Rejected                  |

### S1.3. Redocking and molecular contact analysis

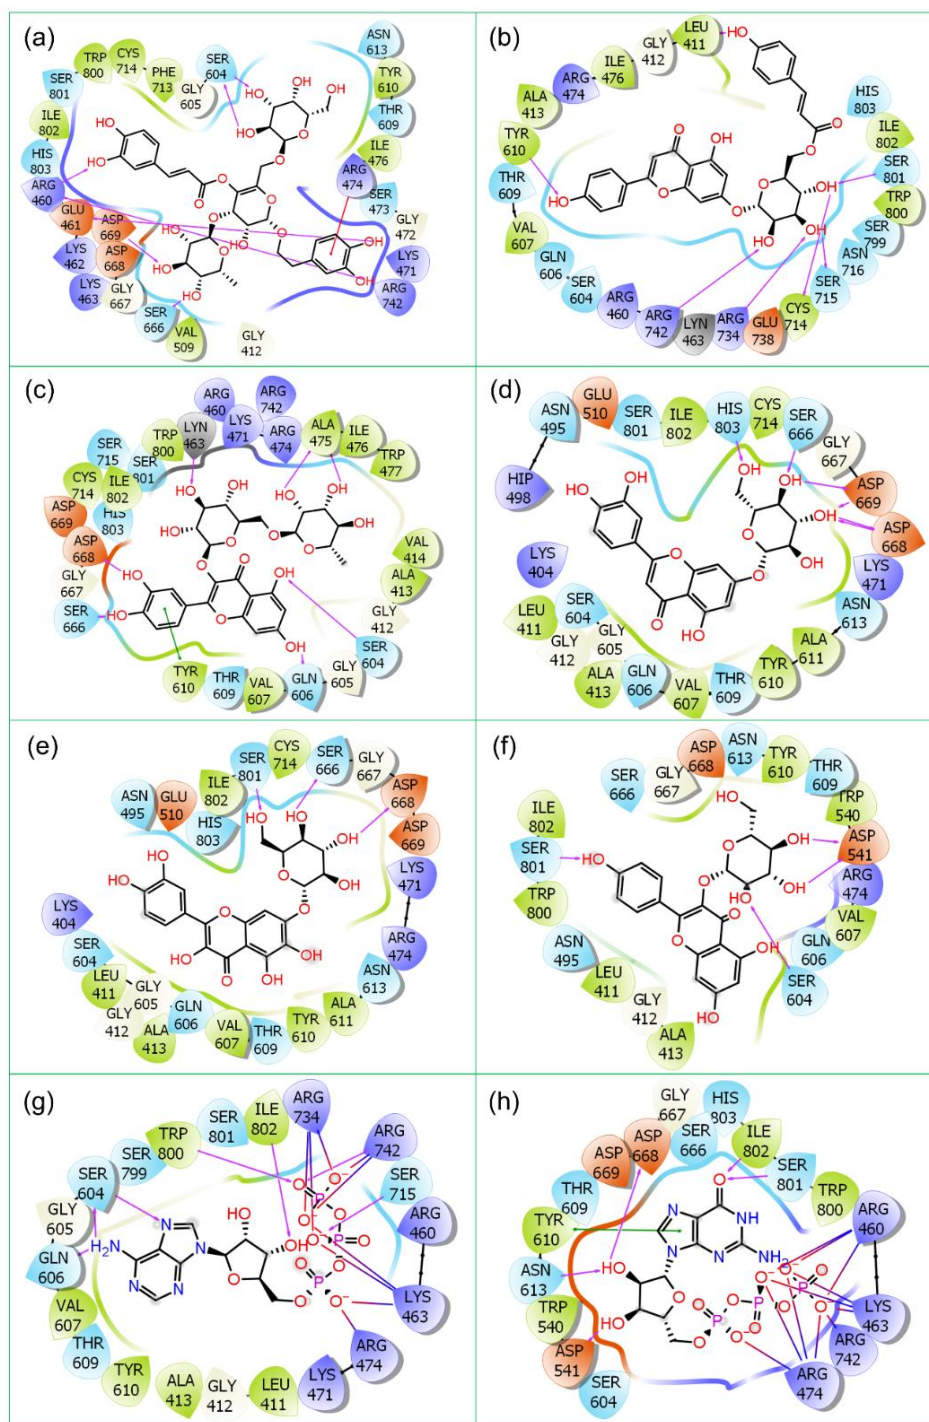

**Figure S1.** Two-dimensional (2D) poses of the selected natural compounds: **(a)** Echinacoside, **(b)** Echinacin, **(c)** Rutin, **(d)** Cynaroside, **(e)** Quercetagenin 7-glucoside, and **(f)** Kaempferol-3-glucoside, with comparison to the reference compounds **(g)** ATP and **(h)** GTP in the selected binding pocket of JEV<sup>RdRp</sup> showing intermolecular interactions with residues extracted at 4 Å around the docked ligand. In 2D interaction maps, pink arrow (H-bond), green line (π-π stacking), red-violet (salt bridge), red (negative), violet (positive), green (hydrophobic), and blue (polar) color residues exhibit the interactions in the respective docked complexes.

#### S1.4. Molecular Dynamics simulation analysis

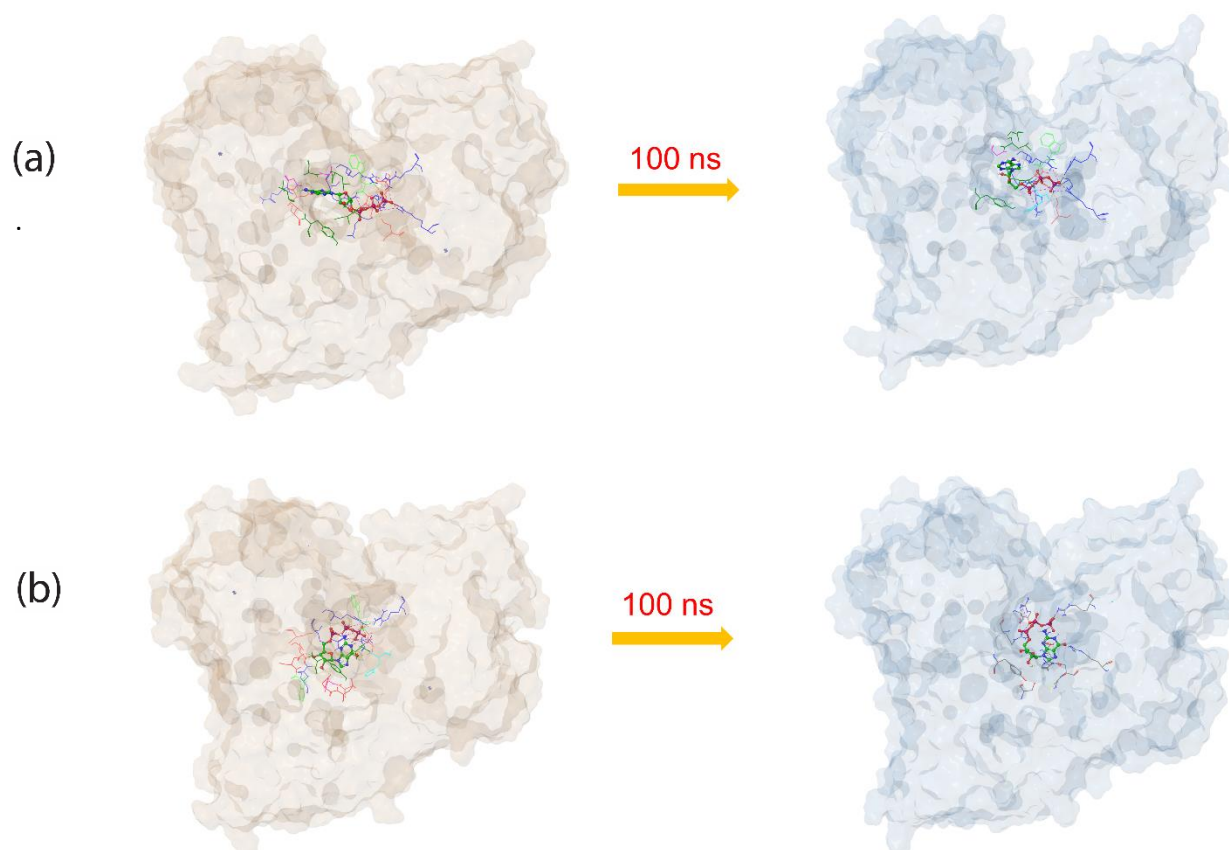

**Figure S2.** Representation of docked Reference compounds (a) ATP and (b) GTP in the selective binding pocket of JEV-RdRp before and after the 100 ns MD simulation.

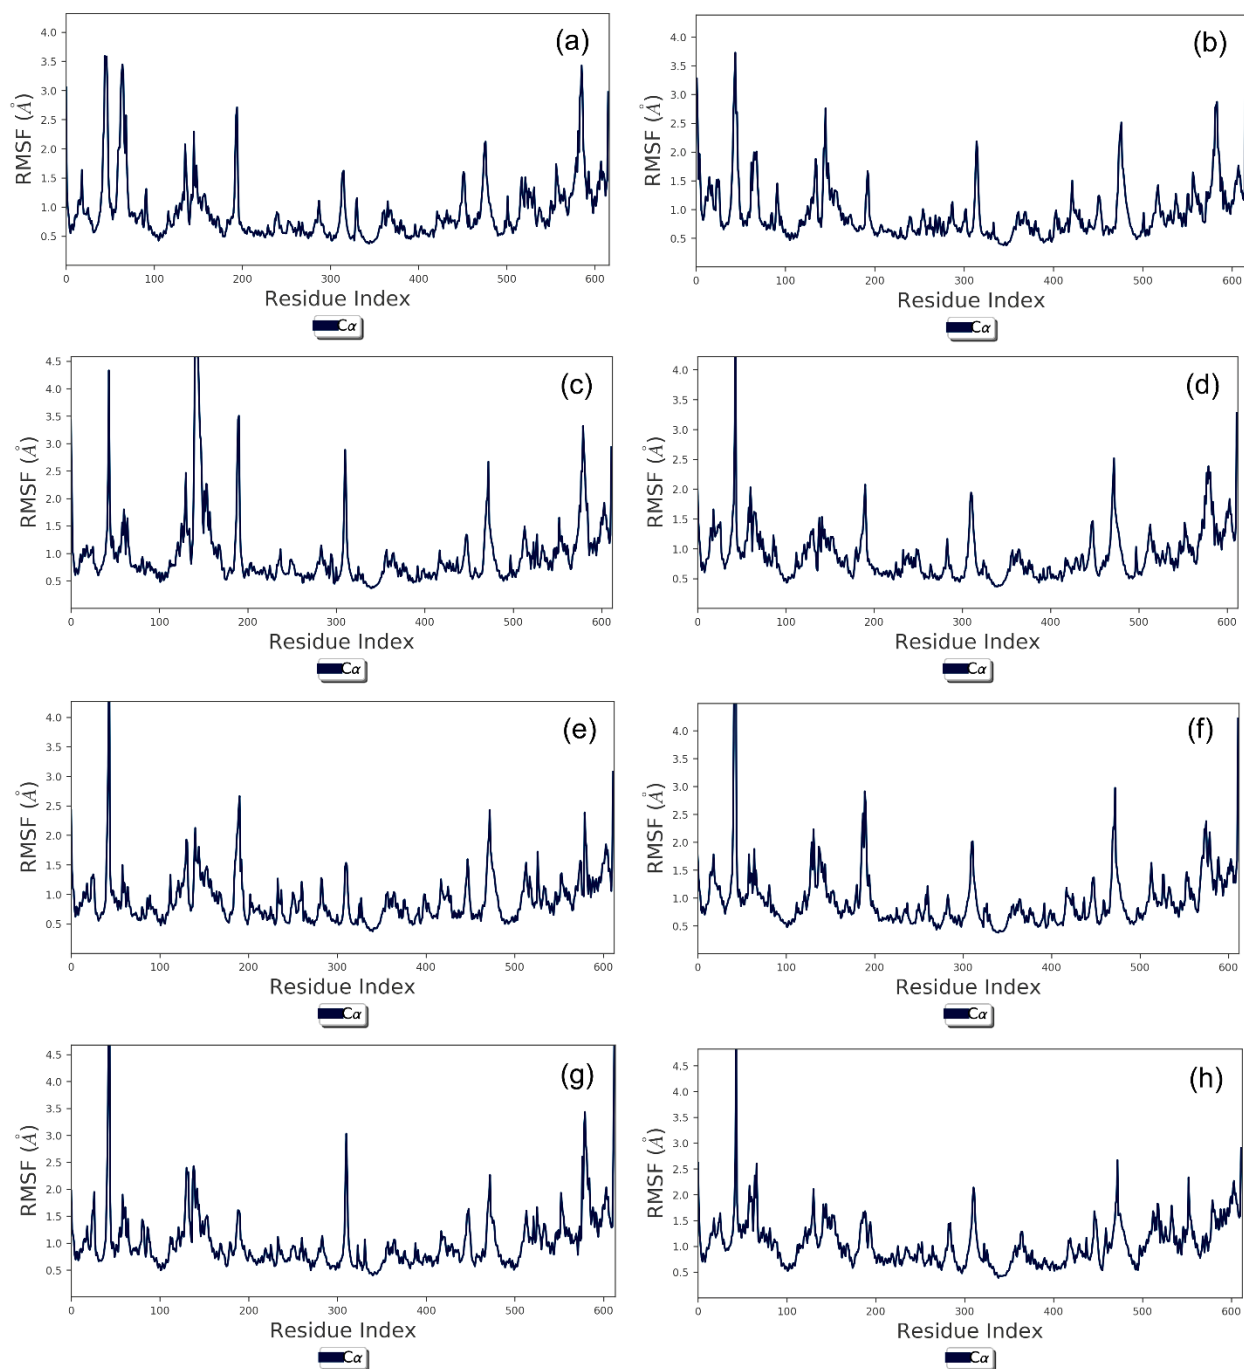

**Figure S3.** RMSF plot for the JEV<sup>RdRP</sup> docked with selected natural compounds: (a) Echinacoside, (b) Echinacin, (c) Rutin, (d) Cynaroside, (e) Quercetagenin 7-glucoside, and (f) Kaempferol-3-glucoside, with comparison to the reference compounds (g) ATP and (h) GTP.

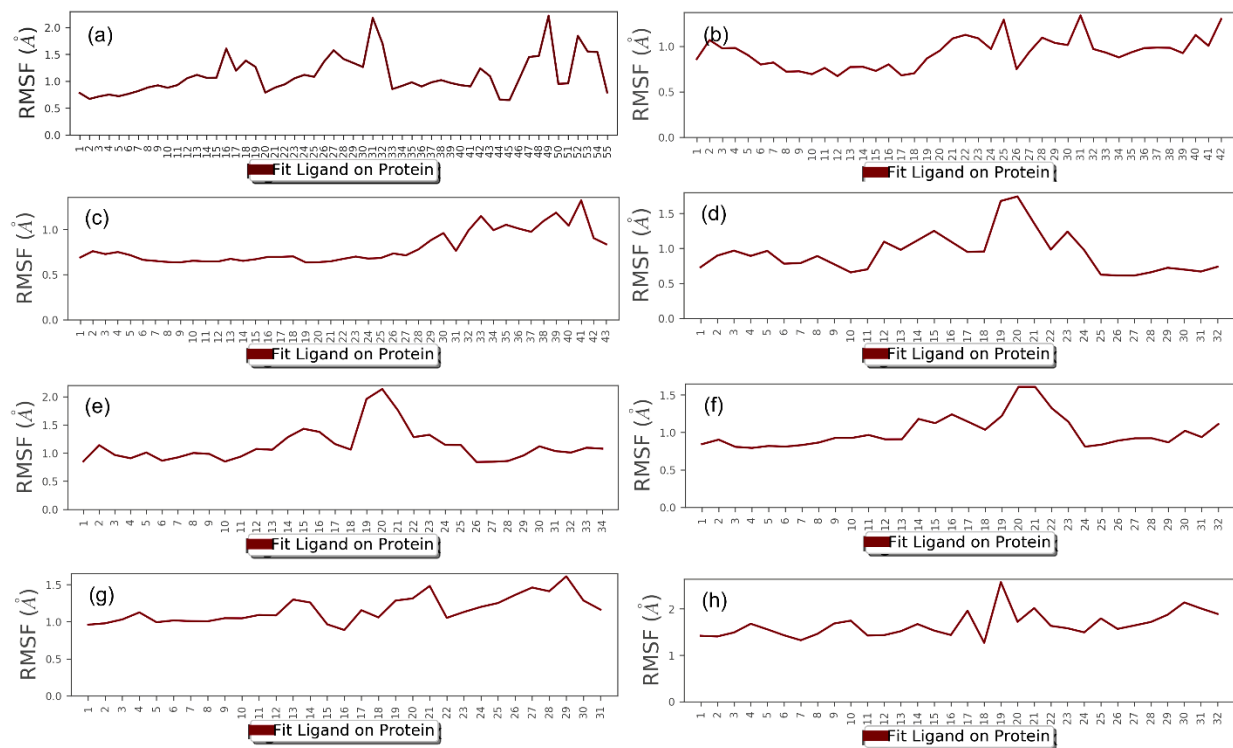

**Figure S4.** RMSF plot for the selected natural compounds: (a) Echinacoside, (b) Echinacin, (c) Rutin, (d) Cynaroside, (e) Quercetagenin 7-glucoside, and (f) Kaempferol-3-glucoside, with comparison to the reference compounds (g) ATP and (h) GTP.

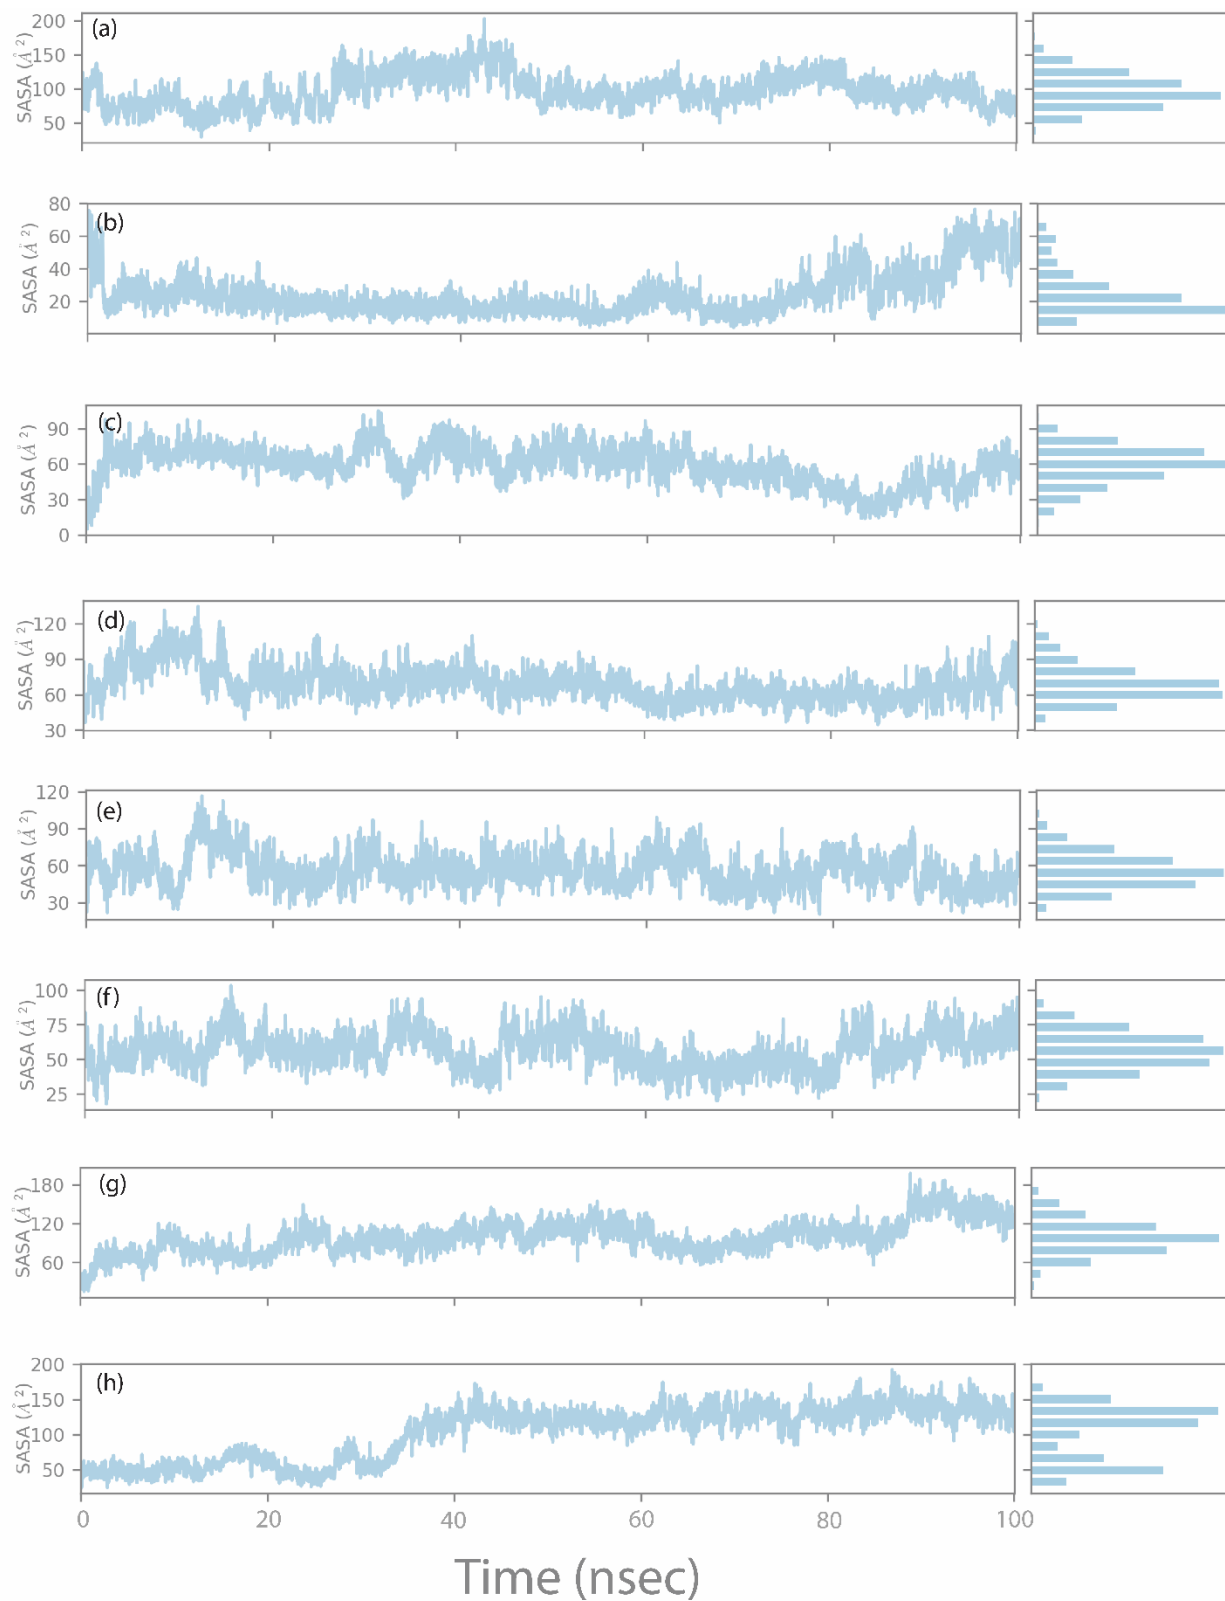

**Figure S5.** Solvent accessible surface area (SASA) of the selected natural compounds: (a) Echinacoside, (b) Echinacin, (c) Rutin, (d) Cynaroside, (e) Quercetageitin 7-glucoside, and (f) Kaempferol-3-glucoside, with comparison to the reference compounds (g) ATP and (h) GTP.



## S1.6. Post-simulation analysis

### S1.6.1. Principal component analysis

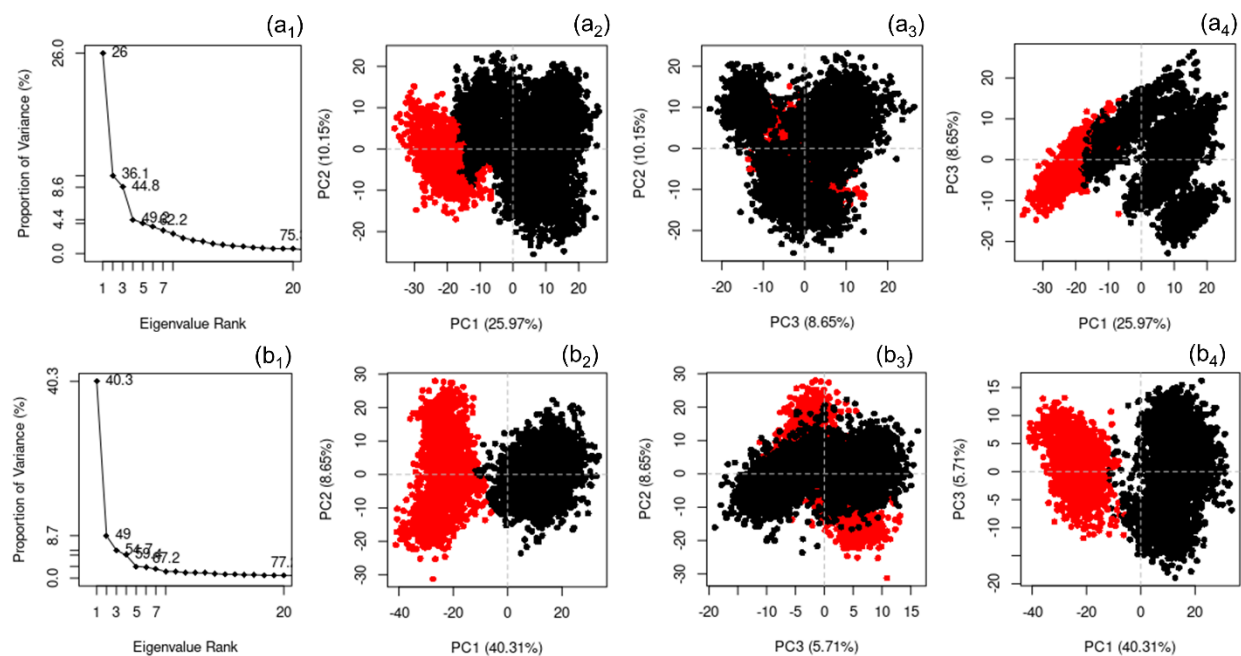

**Figure S6.** Principal component analysis for the generated molecular dynamics trajectories of JEV-RdRp docked with reference compounds (a) ATP and (b) GTP. The percentage of total mean square displacement of residual positional variations recorded in each dimension is categorized by equivalent eigenvalues or PCs.
